# Supplementary material
Source: publisher figshare collection journal article supplement (https://karger.figshare.com/ndownloader/files/12785021)
Supplement: Supplementary file 1 [file 12785021]

| **GA** | **p5** | **p50** | **p95** | **number of volumes measured** |
| --- | --- | --- | --- | --- |
| 8+0 | 1.67 | 2.21 | 2.87 | 29 |
| 9+0 | 2.03 | 2.70 | 3.52 | 62 |
| 10+0 | 2.42 | 3.26 | 4.27 | 67 |
| 11+0 | 2.46 | 3.33 | 4.39 | 17 |
| 12+0 | 2.45 | 3.35 | 4.44 | 3 |

*Table S2: reference values of the width of the cord insertion (mm); GA: gestational age*
